# Supplementary material for: Mosquito-Based Detection of Endogenous Jaagsiekte Sheep Retrovirus in Senegal: Expanding the Scope of Xenosurveillance
Source: Research Square preprint supplement (doi:10.21203/rs.3.rs-5951454/v1), 2025-04-25
Supplement: Supplementary file 1 [file 91c52b926b3ee87bffffc412.xlsx]

## Sheet: Feuil1
Mosquito pool	Location	Collection date	Genius	Species	Sex	Number of individuals	Blood-fed status	Virus Trouvé	Reference Accession ID	Reference Length	% Genome Called	%id	GC Content	ERCC Reads	Total Reads	Mapped Reads	SNPs	Informative Nucleotides	Missing Bases	Ambiguous Bases	Coverage Depth
292939	Barkedji	2017-08-01	Aedes	vexans	Male	40	Unfed	Dezidougou virus	MT096525.1	9380	98	100	36.8	0	2939526	23019	2	9194	149	32	304.1236673773987
								Aedes vexans iflavivirus	MN314969.1	9494	94.2	99.5	39.2	0	2939526	3892	49	8947	427	14	49.275015799452284
301003	Louga	2017-10-01	Culex	quinquefasciatus	Female	5	Fed	Pestivirus H	KY683847.1	12280	97.1	98.3	46.1	38	10771820	6297	205	11922	0	296	59.9307003257329
								Culex iflavivirus	MH188009.1	7112	100	96.5	41.9	38	10771820	37151	252	7111	0	1	618.7525309336334
301005	Louga	2017-10-01	Culex	quinquefasciatus	Female	1		Hubei partiti-like Virus	LC514401.1	1752	98.2	94.8	47.7	5	3506502	857	90	1720	20	1	54.97488584474886
301006	Louga	2017-10-01	Culex	quinquefasciatus	Female	2	Fed	Yongsan iflavivirus	LC513837.1	8391	99.5	94	41.6	55	22446636	4417253	504	8348	0	36	63369.67751161959
								Avian Leukosis Virus	MK951779.1	7524	99.1	99.9	52.6	55	22446636	552121	4	7460	5	54	7983.200026581606
								Hubei partiti-like Virus	LC514400.1	1744	99.1	94.7	47.1	55	22446636	1109	92	1729	3	3	73.24025229357798
								Culex iflavivirus	MH188009.1	7112	99.3	97.1	41.9	55	22446636	6189179	207	7059	0	53	103310.56960067492
301033	Louga	2017-10-01	Aedes	aegypti	Male	1	Unfed	Aedes Albopictus Densovirus	MK182384.1	4048	91.9	96.3	37.5	6	4762526	1827	138	3720	105	72	53.82411067193676
								Dezidougou virus	MT096525.1	9380	98	99.8	37	6	4762526	8219	20	9195	160	13	107.5413646055437
301460	Louga	2017-11-01	Aedes	aegypti	Male	2		Dezidougou virus	MT096525.1	9380	93	99.9	37.2	1	576784	3040	13	8726	631	18	40.47590618336887
301467	Louga	2017-11-01	Culex	quinquefasciatus	Female	39	Fed	Culex iflavivirus	KT726939.1	10706	99.3	98.9	53	60	35731658	8657	113	10627	0	79	90.25537082010088
								Avian leukosis Virus	MK951779.1	7524	99.2	99.9	52.6	60	35731658	254976	5	7462	2	47	3658.4869750132907
301540	Louga	2017-11-01	Culex	quinquefasciatus	Male	5	Unfed	Aedes Albopictus Densovirus	MK182384.1	4048	97.8	95.4	37.8	19	9807026	11018	182	3958	42	0	334.2949604743083
301541	Louga	2017-11-01	Culex	quinquefasciatus	Male	15	Unfed	Pestivirus H	JX985409.1	12279	93.5	98.4	46.2	18	11367554	2610	187	11479	400	326	25.382278687189512
								Hubei mosquito virus	KX883008.1	4971	99.9	98.3	54.6	18	11367554	6111	82	4966	2	1	144.19110842888756
								Culex iflavivirus	KT726939.1	10706	99.9	98.7	53	18	11367554	124869	137	10691	0	15	1249.7660190547356
301276	Louga	2017-11-01	Aedes	aegypti	Male	1	Unfed	Pestivirus A	JX419398.1	12064	95.9	98	45.4	0	369626	27819	226	11565	4	496	260.0397877984085
305309	Louga	2017-11-01	Culex	quinquefasciatus	Male	16	Unfed	Culex flavivirus	KT726939.1	10706	100	98.6	53	55	19426854	45702	152	10706	0	0	475.05613674575005
								Mosquito Densovirus BR/07	GU452720.1	3893	97.6	93.3	37	55	19426854	2939829	253	3801	40	45	88495.49216542512
311257	Barkedji	2019-08-01	Aedes	vexans	Female	50	Unfed	Dezidougou Virus	MT096525.1	9380	98.9	99.6	36.9	12	12683788	4961689	33	9280	99	1	65748.9276119403
311259	Barkedji	2019-08-01	Aedes	vexans	Female	50	Unfed	Dezidougou Virus	MT096525.1	9380	98.2	99.9	36.9	57	21498490	4142	10	9211	131	34	54.40138592750533
311263	Barkedji	2019-08-01	Aedes	vexans	Female	50	Unfed	Dezidougou Virus	JX419398.1	12064	88.7	96.5	45.2	25	9688406	1957	376	10706	830	481	20.028929045092838
311268	Barkedji	2019-08-01	Aedes	vexans	Female	50	Unfed	Dezidougou Virus	MT096525.1	9380	96.2	99.8	36.9	4	5306834	2771	22	9026	347	3	36.23390191897654
311420	Barkedji	2019-09-01	Aedes	vexans	Female	50	Unfed	Dezidougou Virus	MT096525.1	9380	98.6	99.9	36.9	12	10700378	3089318	7	9246	103	29	38194.2921108742
311421	Barkedji	2019-09-01	Aedes	vexans	Female	19	Unfed	Dezidougou Virus	MT096525.1	9380	98.5	100	36.8	8	27302692	22777369	1	9242	99	39	292752.7421108742
311434	Barkedji	2019-09-01	Aedes	vexans	Female	2	Fed	Dezidougou Virus	MT096525.1	9380	98.5	100	36.8	20	28472974	24581929	1	9236	99	45	317249.17484008527
311458	Barkedji	2019-09-01	Culex	poicilipes	Female	50	Unfed	Dezidougou Virus	MT096525.1	9380	98.9	99.7	36.9	1	3970642	2407876	24	9277	99	4	31194.907995735608
								Aedes vexans iflavivirus	MN314969.1	9494	99.8	99	39.2	1	3970642	36413	99	9475	11	0	460.5942700653044
311461	Barkedji	2019-09-01	Culex	poicilipes	Female	50	Unfed	Dezidougou Virus	MT096525.1	9380	98.9	99.7	36.9	2	8066346	6487518	24	9280	99	1	83539.19925373135
								Daezongdong Virus	MT096524.1	9852	99.5	99.8	46.3	2	8066346	112489	15	9799	0	1	1342.7677628907836
311480	Barkedji	2019-09-01	Aedes	sudanensis	Female	1	Unfed	Dezigouogu Virus	MT096525.1	9380	98.9	99.8	36.9	4	4752070	3504225	22	9276	100	0	45377.53571428572
								Daezongdong Virus	MT096524.1	9852	99.4	99.9	46.3	4	4752070	336722	12	9791	1	9	4059.037454323995
311482	Barkedji	2019-09-01	Aedes	vexans	Female	3	Unfed	Aedes Vexans iflavivirus	MN314969.1	9494	98.9	99.7	39.2	2	1939802	8799	27	9385	36	60	107.75394986307141
311483	Barkedji	2019-09-01	Culex	poicilipes	Female	1	Fed	Pestivirus A	JX419398.1	12064	94.6	98.1	45.6	5	1492434	19648	216	11413	3	648	192.26848474801062
311493	Barkedji	2019-09-01	Aedes	unilineatus	Female	2	Fed	Pestivirus A	JX419398.1	12064	94.6	98.1	45.6	5	1492434	19648	216	11413	3	648	192.26848474801062
311494	Barkedji	2019-09-01	Aedes	unilineatus	Female	3	Fed	Jaagsiekte sheep retrovirus	DQ838494.1	7430	97.3	95.8	41.1	26	59668574	14584	303	7232	11	193	234.6043068640646
								Dezidougou Virus	MT096525.1	9380	98.9	99.8	36.9	26	59668574	53157514	23	9278	99	3	689188.0033049041
311497	Barkedji	2019-09-01	Culex	poicilipes	Female	36	Unfed	Pestivirus A	MT265675.1	12193	94.6	96.6	45.5	5	850414	11001	392	11535	95	547	110.3327318953498
311499	Barkedji	2019-09-01	Culex	ethiopicus	Female	37	Unfed	Pestivirus A	JX419398.1	12064	94.8	97.6	45.6	2	950010	9585	276	11440	5	619	94.15492374005305
								Dezidougou Virus	MT096525.1	9380	97.5	99.8	36.9	2	950010	2253	17	9149	210	16	29.61311300639659
311503	Barkedji	2019-09-01	Aedes	vexans	Female	6	Unfed	Aedes Vexans iflavivirus	MT096525.1	9380	98.5	100	36.8	15	34203278	29737904	1	9238	99	43	388547.85362473346
								Dezidougou Virus	MN314969.1	9494	99.2	99.8	39.3	15	34203278	108935	18	9415	12	62	1380.4023593848747
311604	Barkedji	2019-09-01	Culex	quinquefasciatus	Female	1	Fed	pestivirus A	KP941589.1	12250	78	96.1	45.5	6	676392	4181	372	9553	2100	505	40.74963265306123
311605	Barkedji	2019-09-01	Culex	quinquefasciatus	Female	1	Unfed	Dezidougou Virus	MT096525.1	9380	98.2	100	36.8	2	1034110	7357	2	9207	129	39	96.20287846481877
321608	Barkedji	2019-09-01	Culex	quinquefasciatus	Female	1	Fed	Aedes Pseudocutellaris Reovirus	DQ087278.1	3732	99.9	99.3	34.4	50	5122466	66283	26	3730	0	2	2035.8172561629153
								Pestivirus A	KP941591.1	12224	94.6	97.1	45.6	50	5122466	65936	338	11558	14	646	641.5136616492147
311847	Barkedji	2019-10-01	Culex	neavei	Female	50	Unfed	USUTU Virus	KC754957.1	10825	99.2	98.6	51	31	21024442	4825	155	10734	88	3	51.96960739030023
								Bagaza Virus	KR108245.1	10998	99	98.5	49.3	31	21024442	3330	167	10887	93	0	36.04391707583197
								Barkedji Virus	EU078325.1	10582	99.7	96.8	51	31	21024442	3871	335	10550	39	6	44.13258363258363
311853	Barkedji	2019-10-01	Culex	neavei	Female	50	Unfed	Sindbis Virus	KY616987.1	11527	100	98.5	51.4	94	95265766	678130	172	11527	0	0	6981.666001561551
								West-Nile Virus	MT863559.1	10923	100	98.8	51.2	94	95265766	32160	134	10921	0	2	342.99826055113067
								Bagaza Virus	MF380434.1	10954	99.5	97.7	49.6	94	95265766	23560	253	10902	19	1	250.22201935366076
								Barkedji Virus	EU078325.1	10582	95.5	98.7	51.2	94	95265766	43875	129	10110	21	450	489.983367983368
321659	kédougou	2019-10-01	Aedes	aegypti	Female	2	Unfed	Pestivirus A	KP941591.1	12224	94.1	97	45.5	5	1488302	49883	346	11508	25	678	485.08491492146595
321660	kédougou	2019-10-01	Aedes	centropunctatus	Female	1	Unfed	Pestivirus A	MH231153.1	12303	94.2	98.2	45.8	10	15249078	98215	214	11593	3	514	965.0984312769243
321661	kédougou	2019-10-01	Aedes	furcifer	Female	2	Fed	Pestivirus A	KP941591.1	12224	94.2	97	45.5	14	5732900	73120	343	11516	4	670	723.2737238219895
								Mosquito Densovirus BR/07	GU452720.1	3893	92.2	98.4	37.7	14	5732900	660	59	3588	133	5	20.73105574107372
321705	kédougou	2019-10-01	Aedes	aegypti	Female	4	Unfed	Taesano Aedes Virus	LC496784.1	9385	93.8	97.6	39.1	1	2445406	5028	207	8807	318	194	61.97261587639851
321725	Kédougou	2019-10-01	Aedes	aegypti	Female	2	Fed	Pestivirus A	KP941591.1	12224	94.4	97	45.7	105	24758130	74839	348	11537	11	641	719.1969895287958
								Taesano Aedes Virus	LC496784.1	9385	100	96.9	39.1	105	24758130	221099	293	9386	0	0	2649.774640383591
321786	kédougou	2019-10-01	Aedes	dalzieli	Female	57	Unfed	Pestivirus A	KC963967.1	12301	93.8	97	45.8	33	33547038	45984	342	11543	8	553	452.9604910169905
321797	kédougou	2019-10-01	Aedes	dalzieli	Female	1	Unfed	Pestivirus A	KP941591.1	12224	94.2	97.4	45.6	7	2773234	249448	298	11513	4	689	2430.3758180628274
