# Supplementary material for: Mosquito-Based Detection of Endogenous Jaagsiekte Sheep Retrovirus in Senegal: Expanding the Scope of Xenosurveillance
Source: Research Square preprint supplement (doi:10.21203/rs.3.rs-5951454/v1), 2025-04-25
Supplement: Supplementary file 2 [file ab9c375aaef12f9bc92bd328.docx]

Table. Confirmatory RT-qPCR assays on blood-fed mosquito pools.

| ID échantillon | Ct RT-PCR set 1 | Ct RT-PCR set 2 | U3hn PCR |
| --- | --- | --- | --- |
| 311494 | 29,9 | 28,36 | + |
| 311483 | - | - | - |
| 311493 | - | - | - |
| 311494 | - | - | - |
| 311604 | - | - | - |
| 321608 | - | - | - |
| 321661 | - | - | - |
| 321663 | - | - | - |
| 321725 | - | - | - |

+ Positive PCR result

- Negative PCR result
